# Supplementary material for: Co-aggregation of pro-inflammatory S100A9 with α-synuclein in Parkinson’s disease: ex vivo and in vitro studies
Source: PubMed Central journal article supplement (PMC5987543; doi:10.1186/s12974-018-1210-9), 2018-06-04

**A**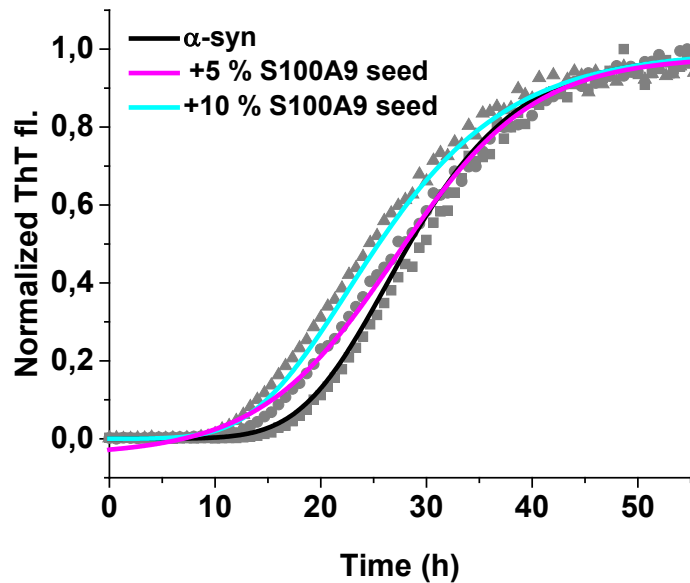**B**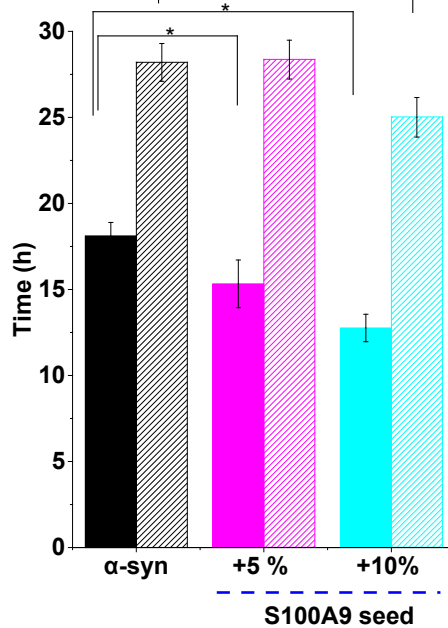**C**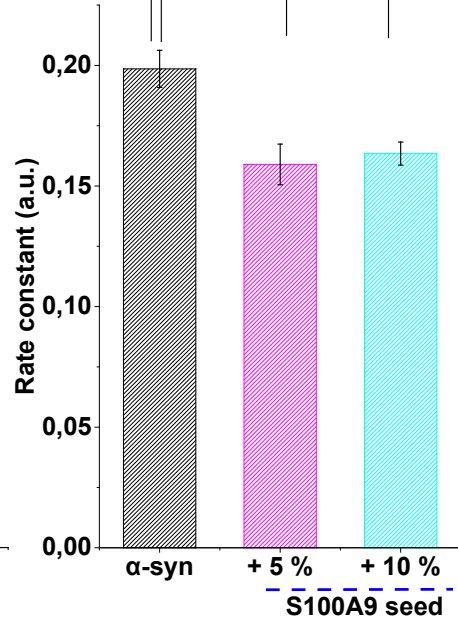

Supplement: 12974_2018_1210_MOESM1_ESM.pdf [file 12974_2018_1210_MOESM1_ESM.pdf]
