# Supplementary material for: Co-aggregation of pro-inflammatory S100A9 with α-synuclein in Parkinson’s disease: ex vivo and in vitro studies
Source: PubMed Central journal article supplement (PMC5987543; doi:10.1186/s12974-018-1210-9), 2018-06-04
Supplement: 12974_2018_1210_MOESM2_ESM.pdf [file 12974_2018_1210_MOESM2_ESM.pdf]

|        | Monomer $\alpha$ -syn | Monomer S100A9 | Monomer mixture | Oligomer $\alpha$ -syn | Oligomer S100A9 | Oligomer mixture | Fibrill $\alpha$ -syn | Fibrill s100a9 | Fibrill mixture |
|--------|-----------------------|----------------|-----------------|------------------------|-----------------|------------------|-----------------------|----------------|-----------------|
| Buffer | NS                    | *              | NS              | *                      | **              | **               | NS                    | **             | *               |
|        | Monomer $\alpha$ -syn | **             | *               | **                     | **              | **               | *                     | **             | *               |
|        |                       | Monomer S100A9 | NS              | *                      | *               | *                | NS                    | *              | NS              |
|        |                       |                | Monomer mixture | *                      | *               | **               | NS                    | NS             | NS              |
|        |                       |                |                 | Oligomer $\alpha$ -syn | *               | NS               | *                     | NS             | NS              |
|        |                       |                |                 |                        | Oligomer S100A9 | NS               | **                    | NS             | *               |
|        |                       |                |                 |                        |                 | Oligomer mixture | *                     | NS             | NS              |
|        |                       |                |                 |                        |                 |                  | Fibrill $\alpha$ -syn | *              | NS              |
|        |                       |                |                 |                        |                 |                  |                       | Fibrill S100A9 | NS              |
